# Supplementary material for: One-pot electrochemical synthesis of polydopamine coated magnetite nanoparticles
Source: Royal Society of Chemistry journal article supplement (doi:10.1039/c4ra08065c), 2014-01-01
Supplement: c4ra08065c1.pdf [file c4ra08065c1.pdf]

## One-pot electrochemical synthesis of polydopamine coated magnetite nanoparticles

Supporting information

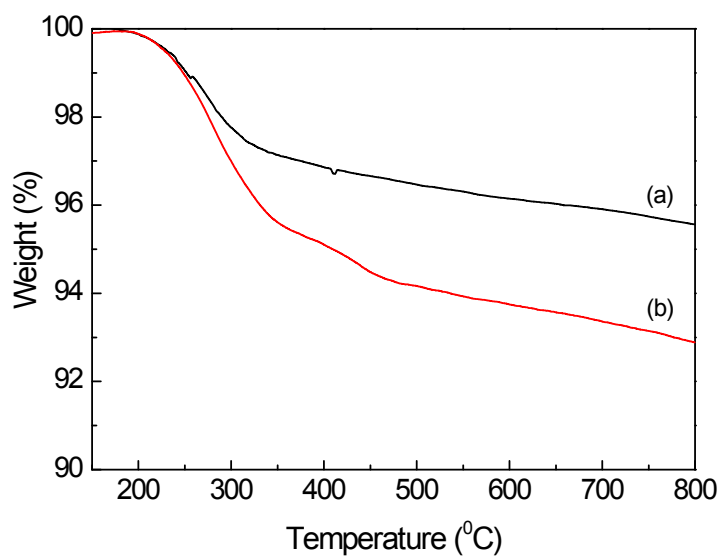

**Figure S1.** TGA thermograms of a) naked magnetite nanoparticles synthesized electrochemically and of b) Fe<sub>3</sub>O<sub>4</sub>@PDA-1 synthesized following approach 1.

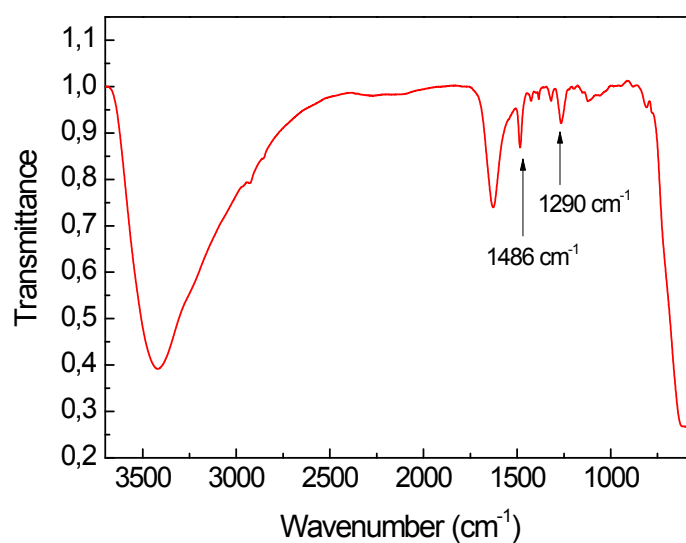

**Figure S2.** FTIR of polydopamine coated magnetic nanoparticles  $\text{Fe}_3\text{O}_4\text{@PDA-2-5mg}$  synthesized following approach 2.

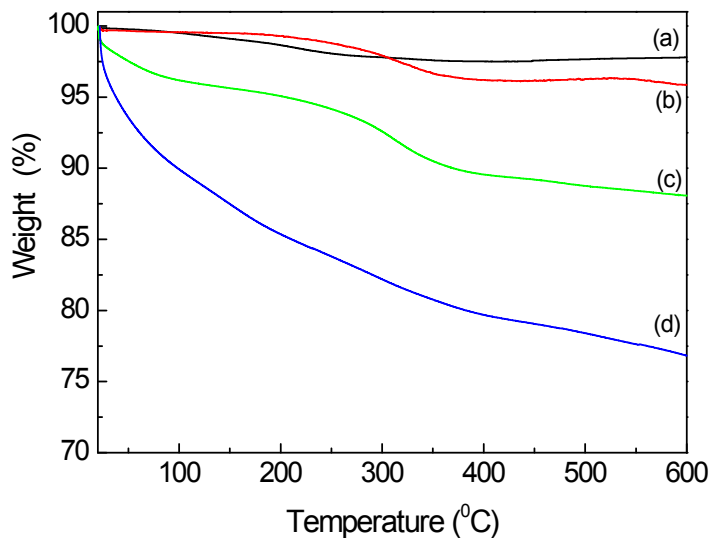

**Figure S3.** TGA thermograms of magnetite nanoparticles synthesized electrochemically by approach 2 a) naked NPs, b)  $\text{Fe}_3\text{O}_4\text{@PDA-2-2mg}$ , c)  $\text{Fe}_3\text{O}_4\text{@PDA-2-5mg}$  and d)  $\text{Fe}_3\text{O}_4\text{@PDA-2-10mg}$ .

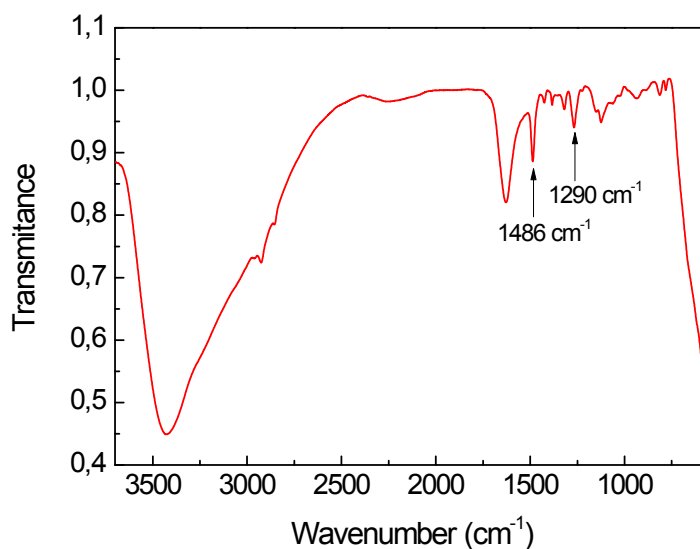

**Figure S4.** FTIR of polydopamine coated magnetic nanoparticles  $\text{Fe}_3\text{O}_4\text{@PDA-3-40mg}$  synthesized following approach 3.

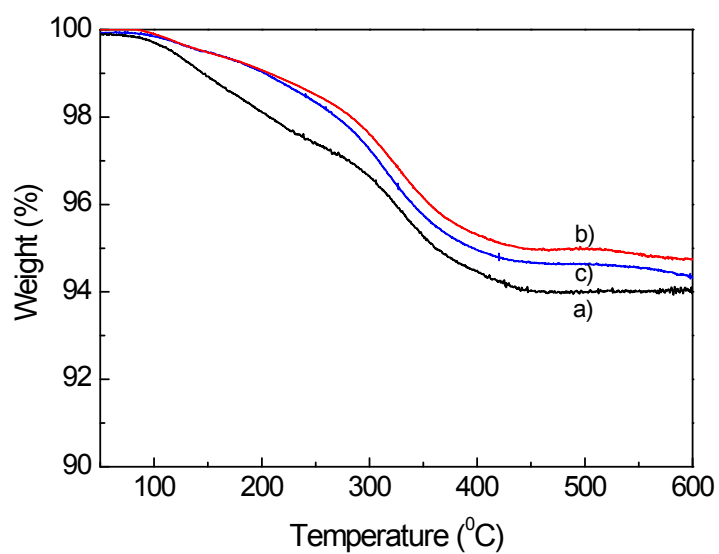

**Figure S5.** TGA thermograms of magnetite nanoparticles synthesized electrochemically by approach **3**: a) Fe<sub>3</sub>O<sub>4</sub>@PDA-**3**-20mg, b) Fe<sub>3</sub>O<sub>4</sub>@PDA-**3**-40mg and c) Fe<sub>3</sub>O<sub>4</sub>@PDA-**3**-60mg.
